# Supplementary material for: Rapid identification of candidate genes for resistance to tomato late blight disease using next-generation sequencing technologies
Source: PubMed Central journal article supplement (PMC5734779; doi:10.1371/journal.pone.0189951), 2017-12-18
Supplement: pone.0189951.s001.pdf [file pone.0189951.s001.pdf]

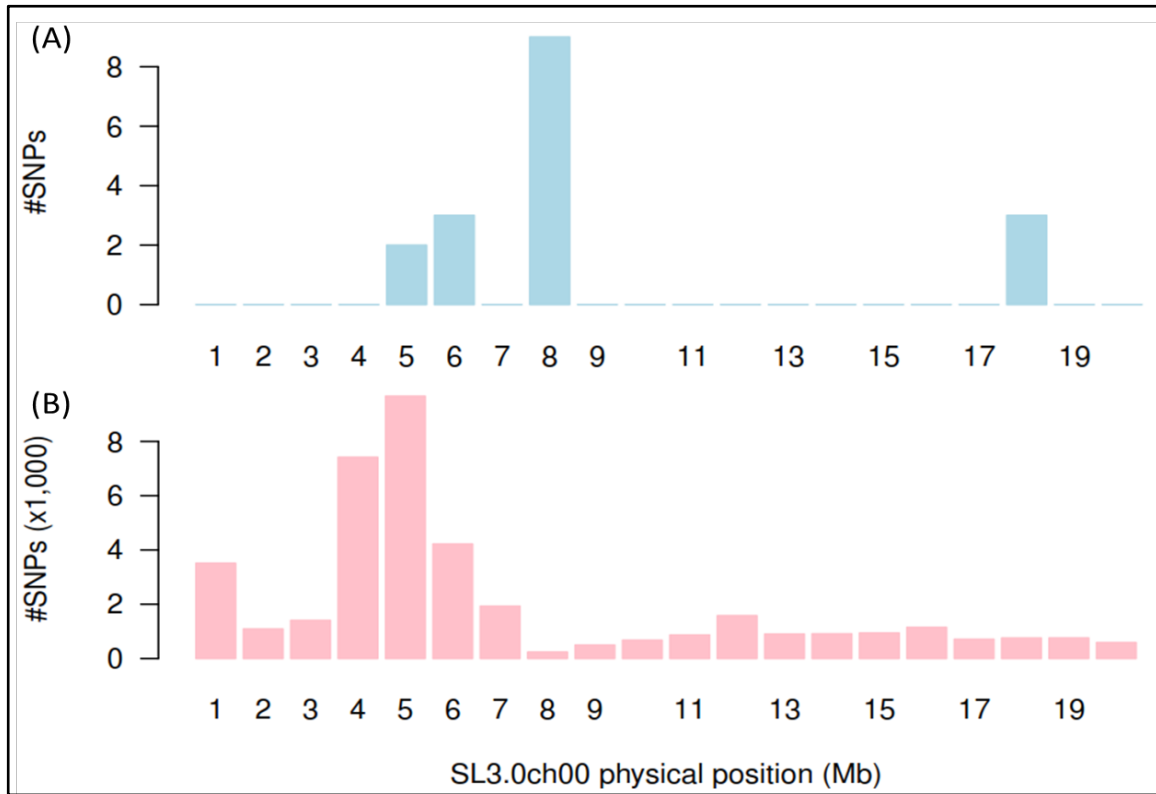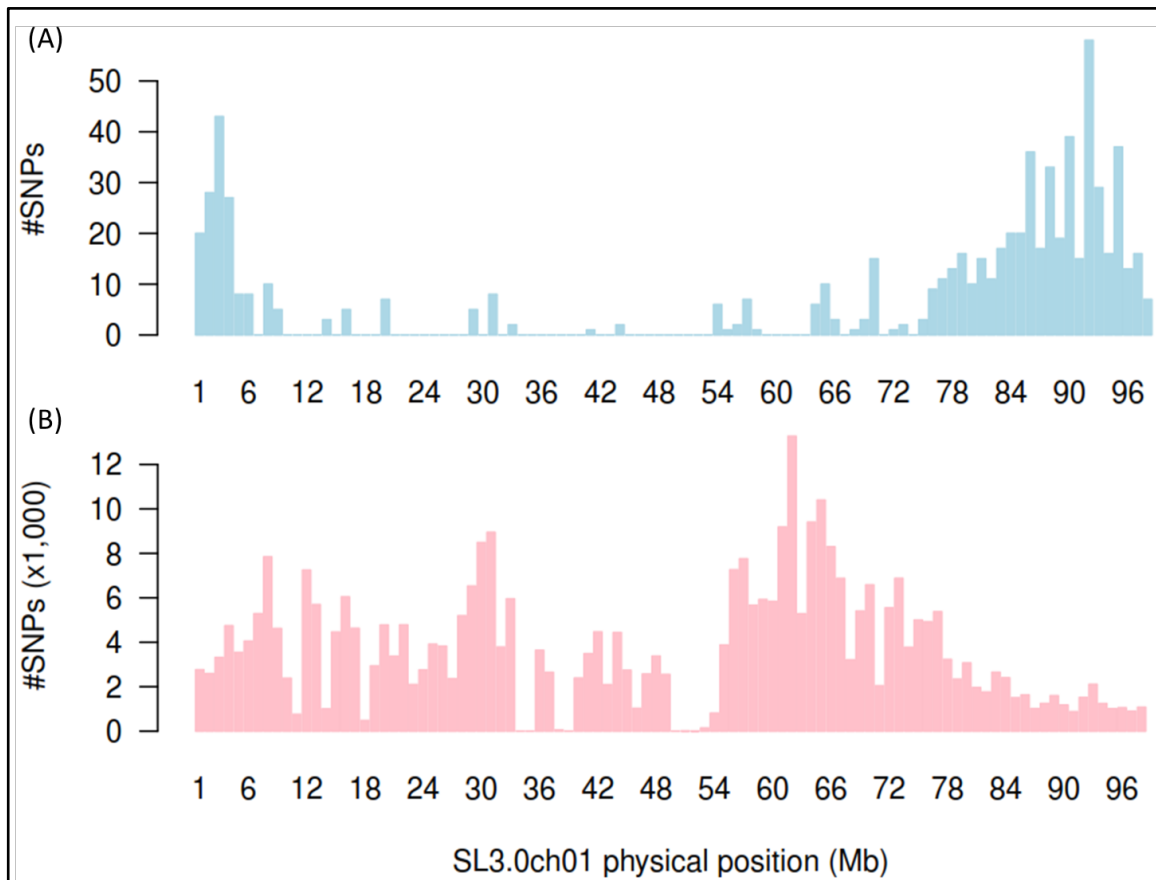

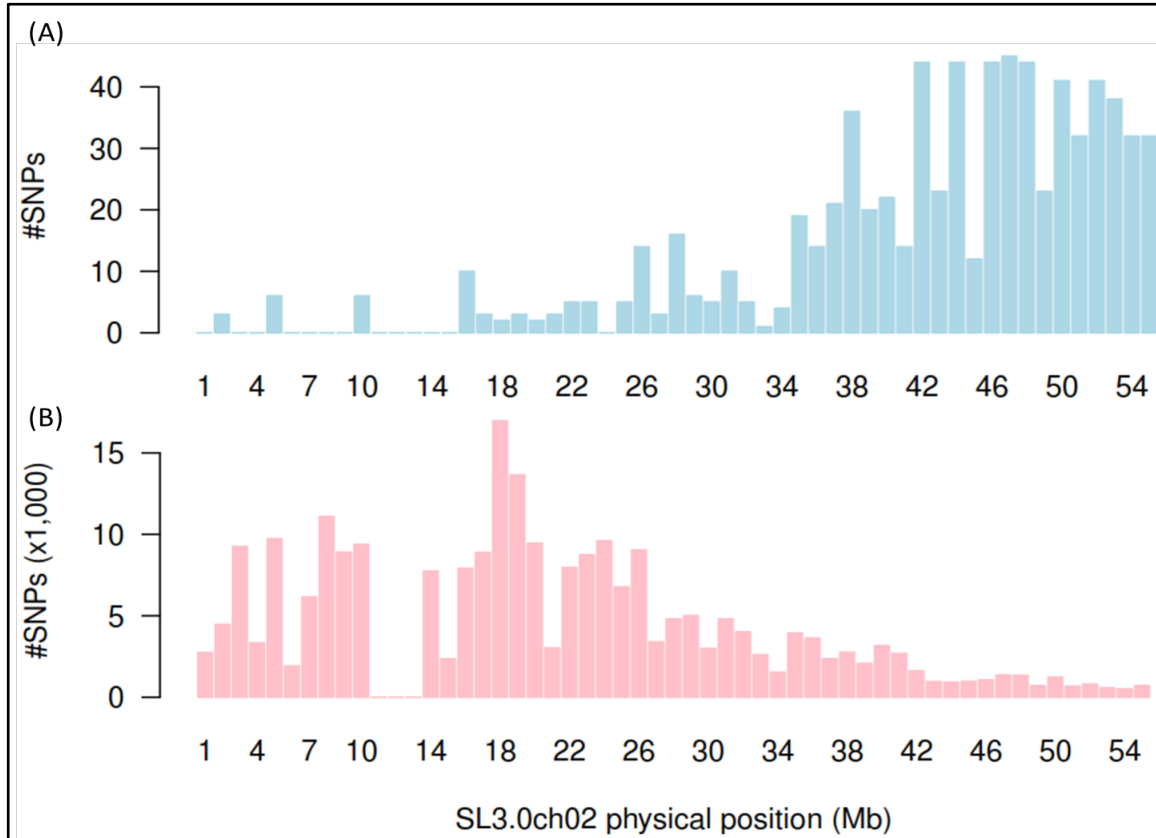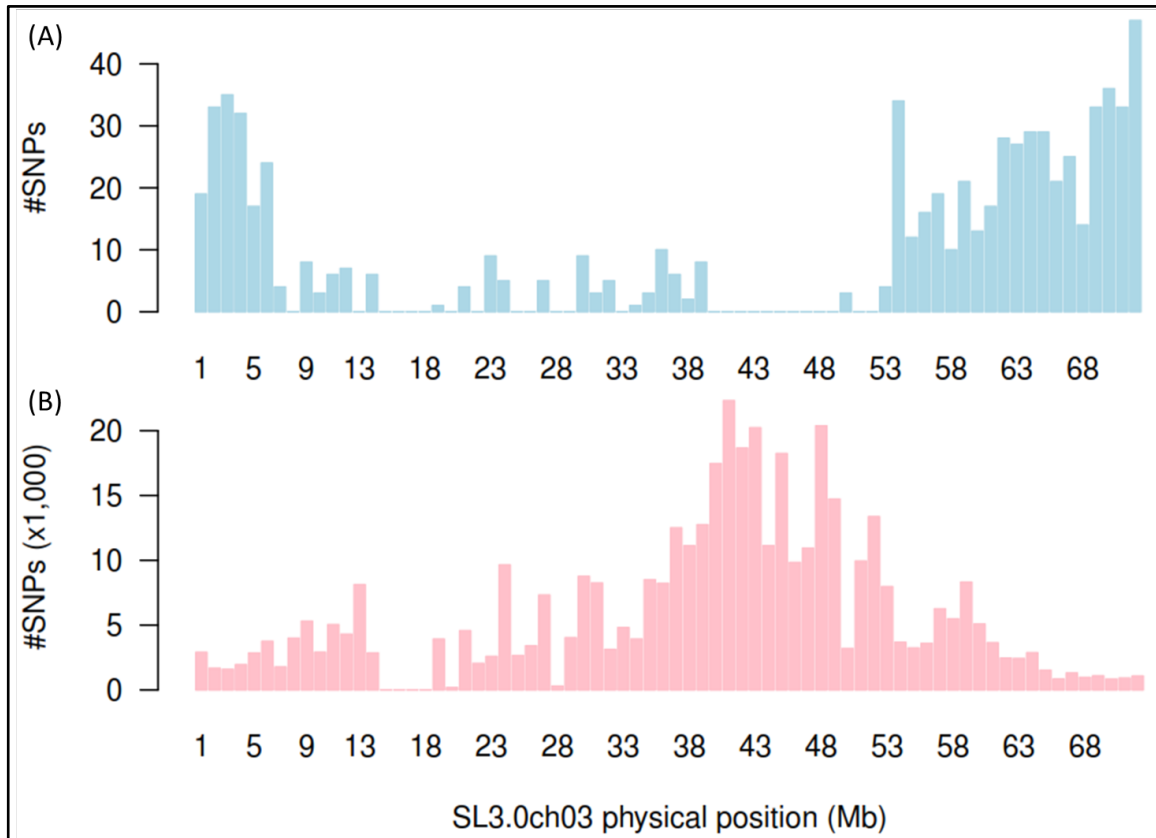

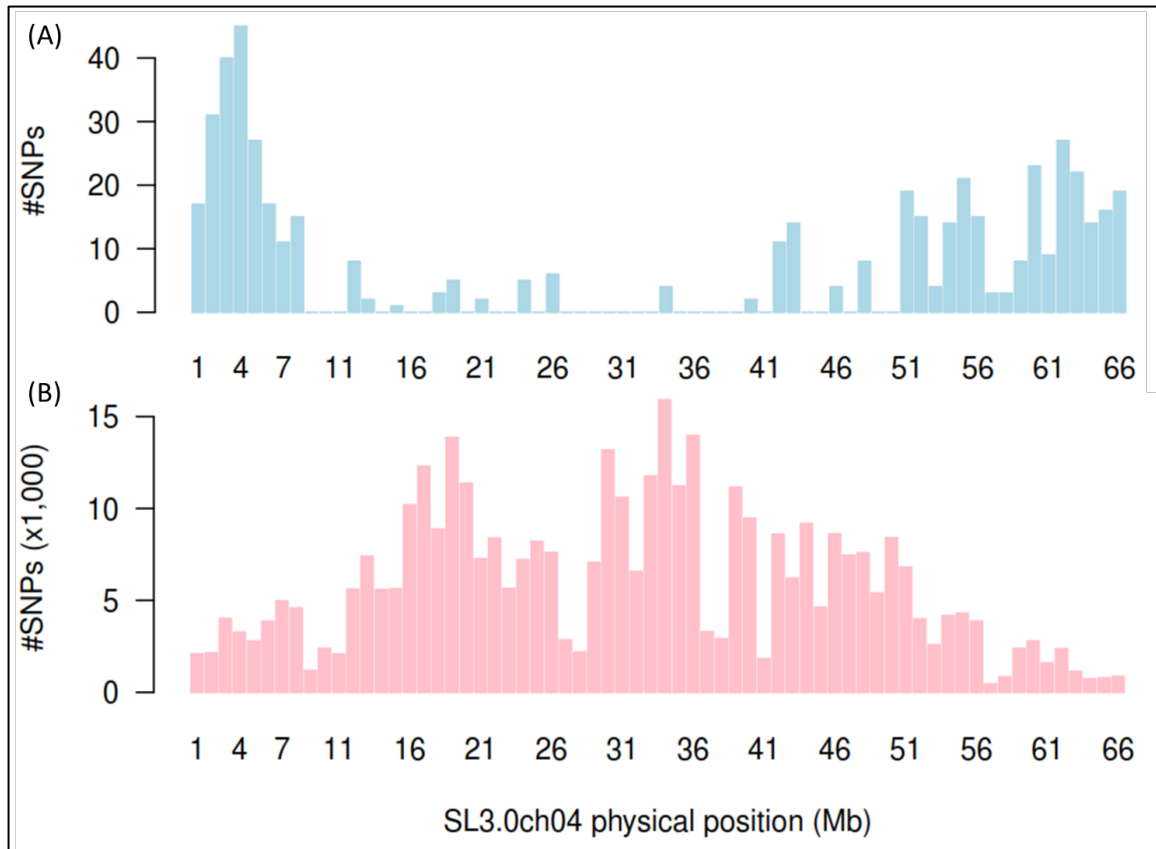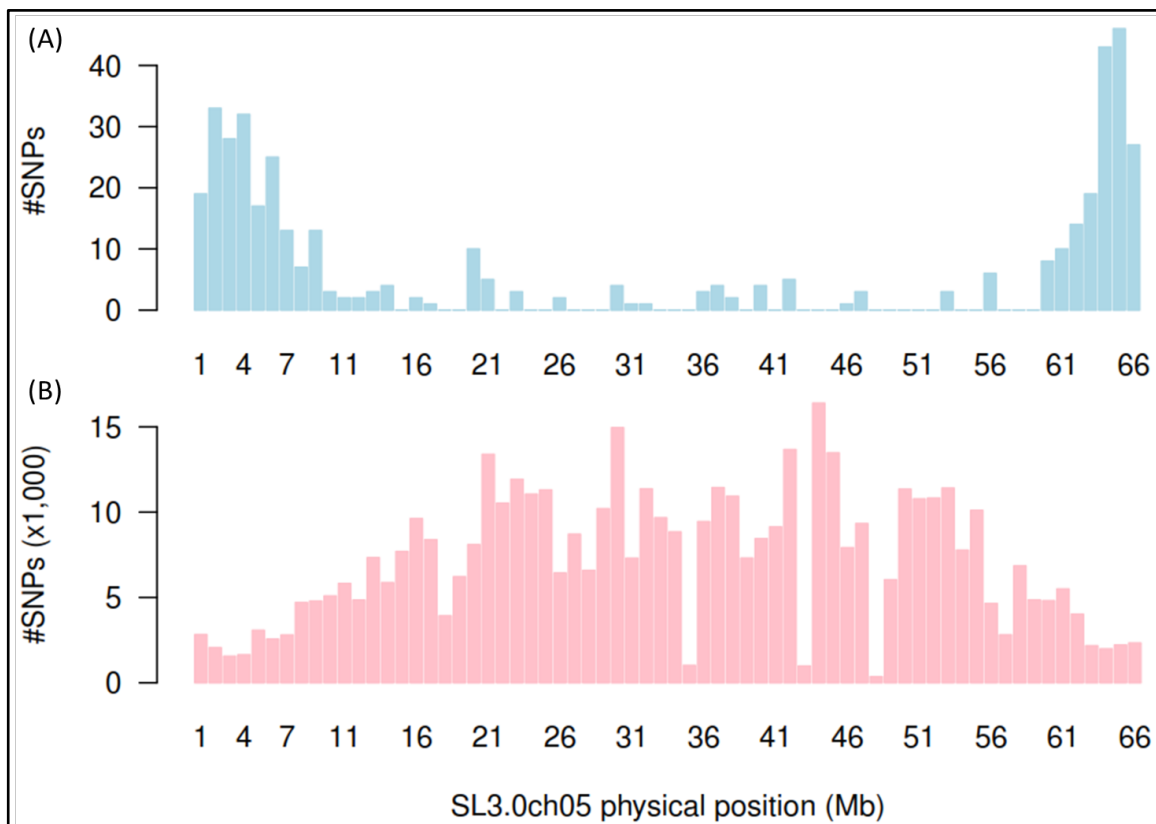

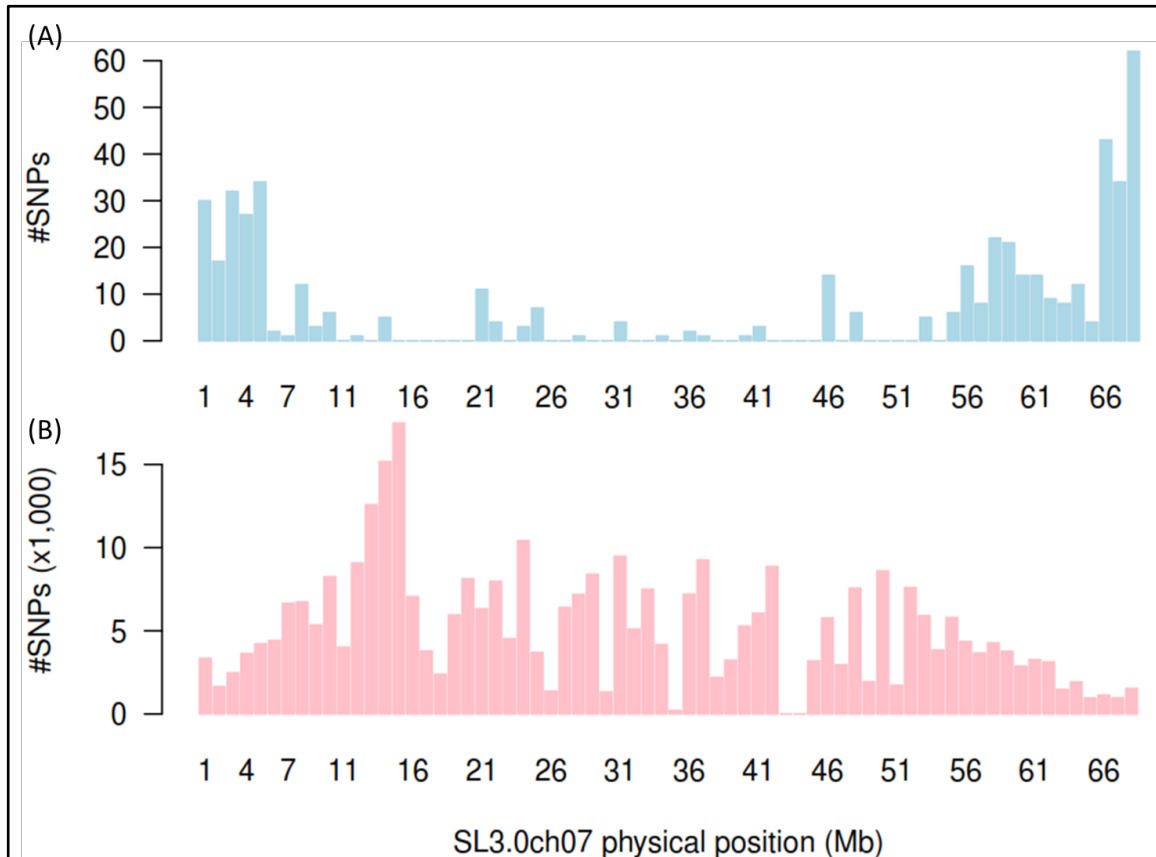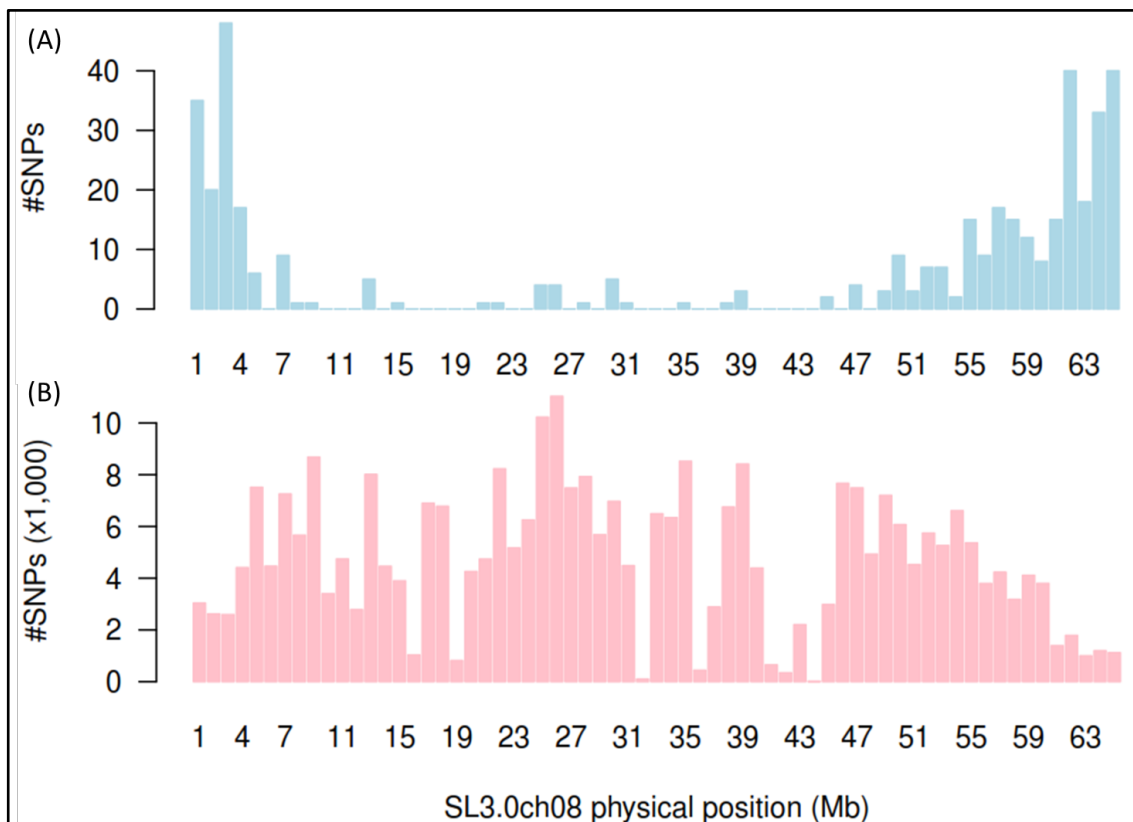

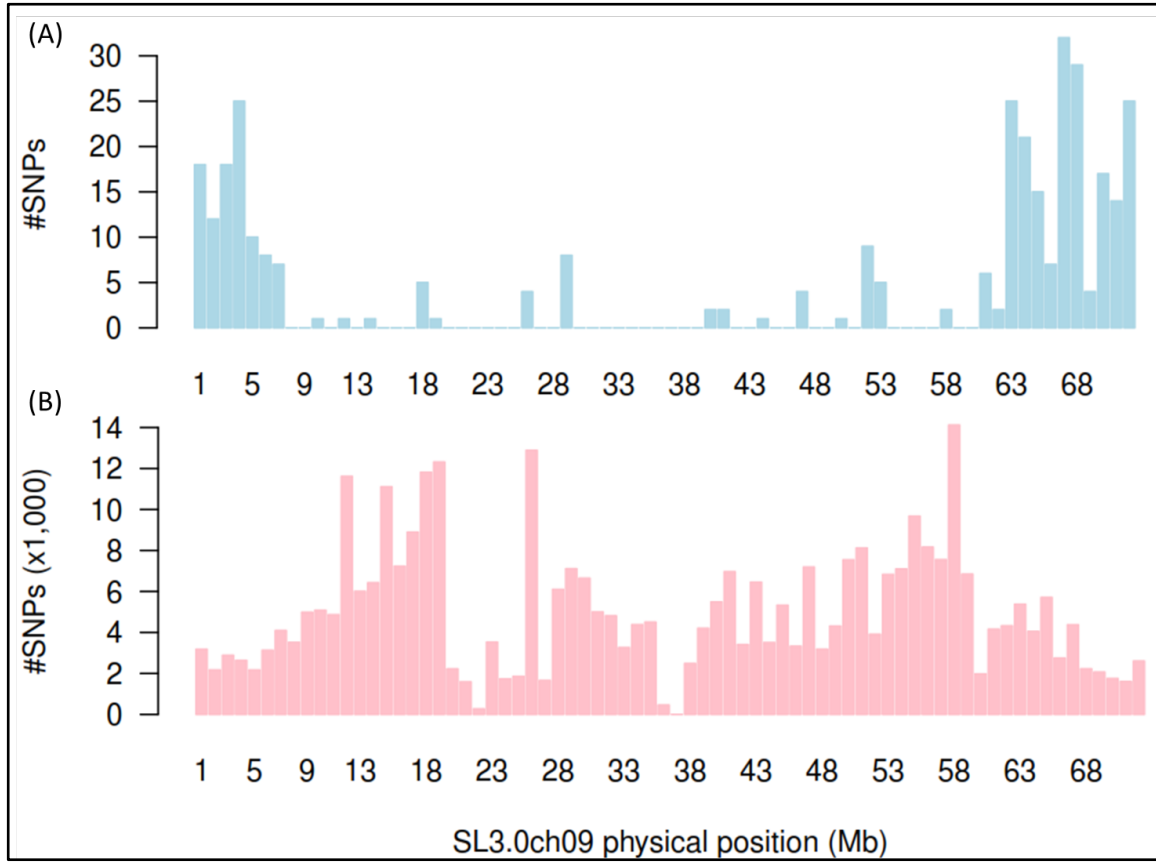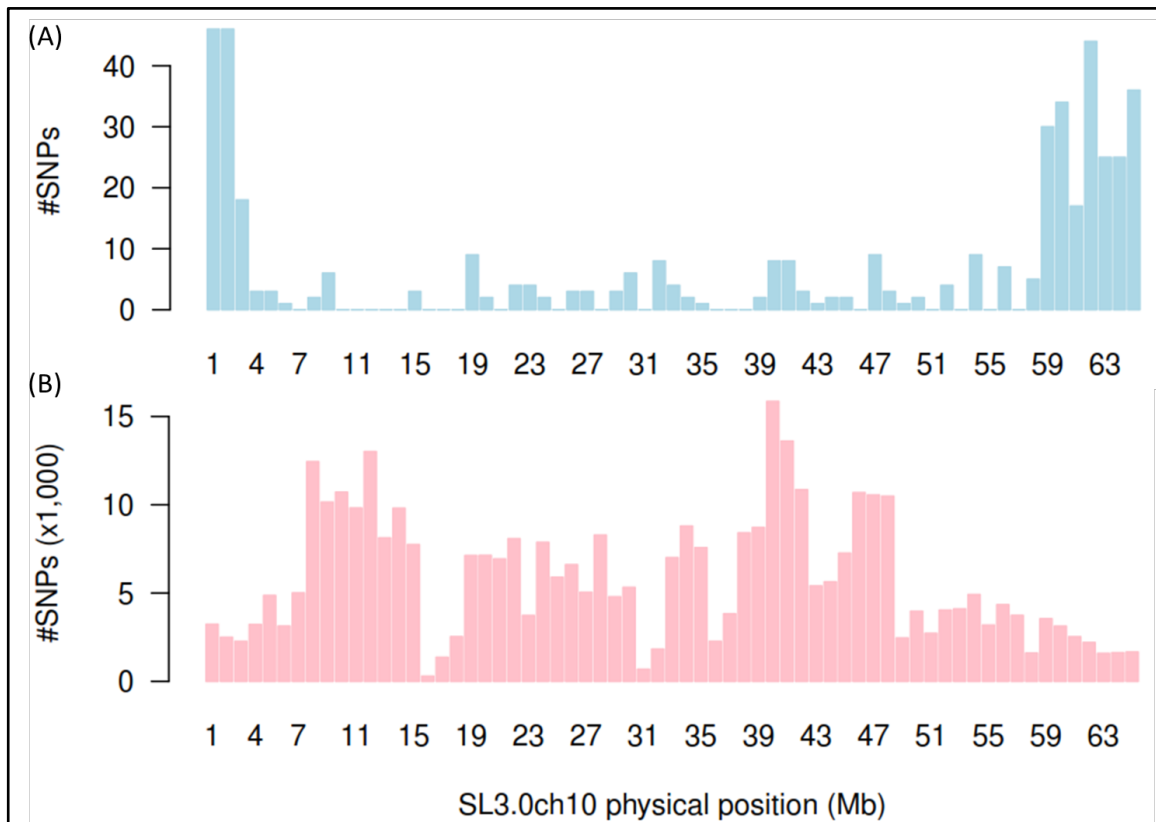

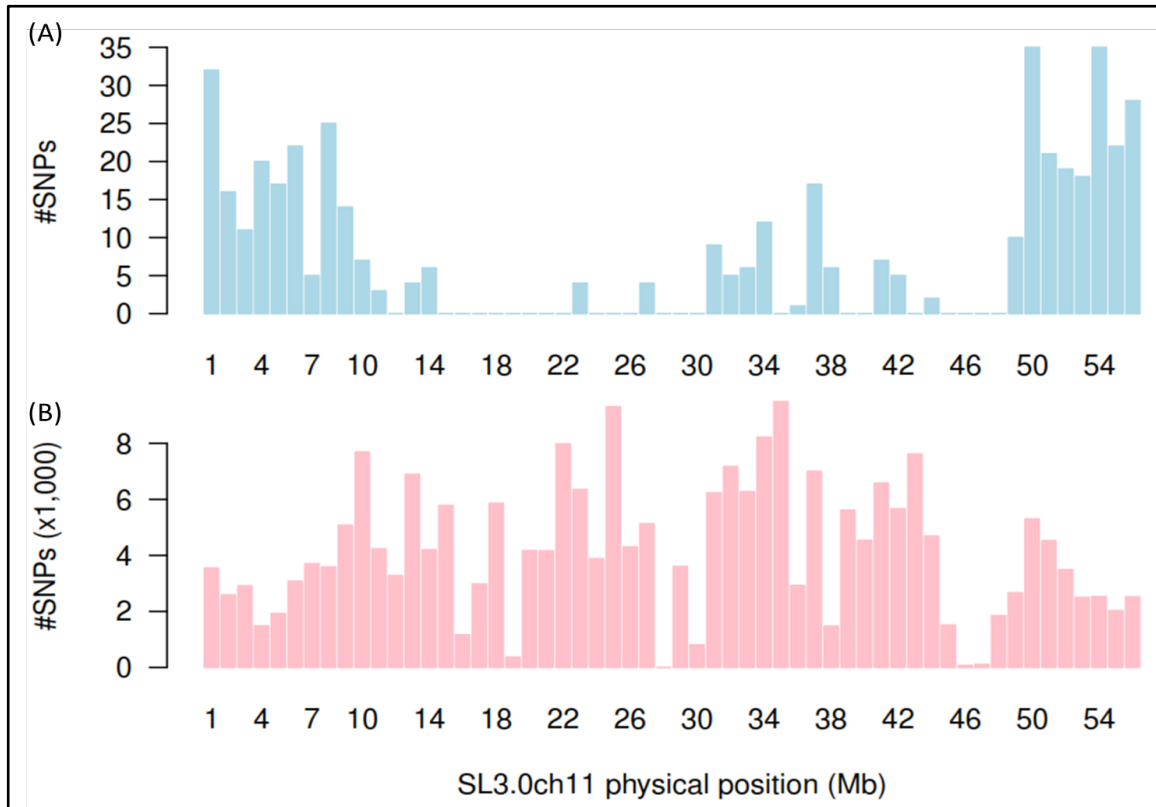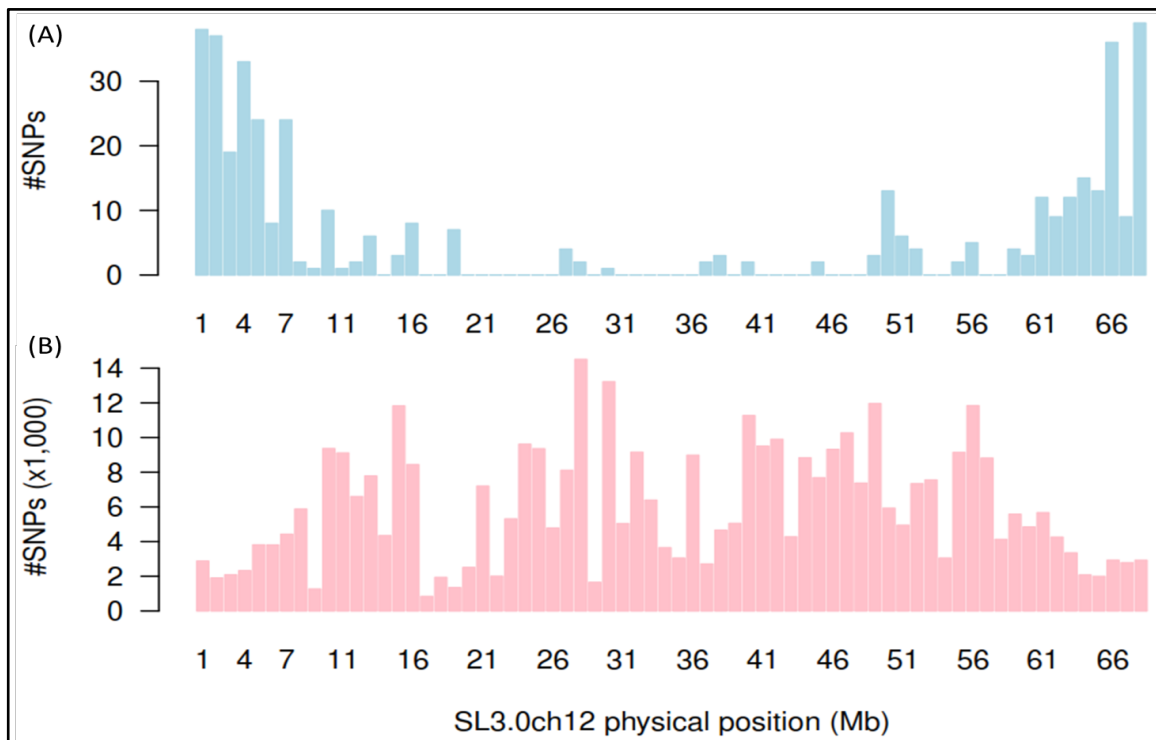

**Fig S1.** Physical positions of SNP markers across the tomato chromosomes (Chr00 – Chr12) except ch06 using R package. The SNP markers were generated using the next-

generation sequencing technologies and mapped on the reference genome of tomato SL3.0 version, (A) the double-digest restriction site-associated DNA sequencing (ddRAD-Seq), (B) the whole-genome shotgun resequencing (WGRS) approaches.
