# Supplementary material for: Rapid identification of candidate genes for resistance to tomato late blight disease using next-generation sequencing technologies
Source: PLoS One. 2017 Dec 18;12(12):e0189951. doi: 10.1371/journal.pone.0189951 (PMC5734779; doi:10.1371/journal.pone.0189951)
Supplement: S4 Table — (XLSX) [file pone.0189951.s005.xlsx]

## Sheet: Sheet1
Table S4 Distribution of the SNP markers on the 12 tomato chromosomes from WGRS and ddRAD-Seq analysis
		WGRS		ddRAD-Seq
Chromosome	Length of chromosome	Number of SNPs	Variants rate*	Number of SNPs	Variants rate**
SL3.0ch01	98455869	362351	271	743	132511
SL3.0ch02	55977580	245398	228	780	71766
SL3.0ch03	72290146	426843	169	749	96515
SL3.0ch04	66557038	389471	170	541	123025
SL3.0ch05	66723567	473915	140	468	142571
SL3.0ch06	49794276	201490	247	560	88918
SL3.0ch07	68175699	347377	196	512	133155
SL3.0ch08	65987440	310274	212	456	144709
SL3.0ch09	72906345	363348	200	354	205950
SL3.0ch10	65633393	379117	173	465	141147
SL3.0ch11	56597135	233973	241	454	124663
SL3.0ch12	68126176	406952	167	432	157699
Total	807224664	4140509	195	6514	123921
WGRS= Whole-genome shotgun resequencing
ddRAD-Seq = Double-digest restriction-site associated DNA sequencing
* = one variant every 195 bases
** = one variant every 123,921 bases
