# Supplementary material for: Rapid identification of candidate genes for resistance to tomato late blight disease using next-generation sequencing technologies
Source: PLoS One. 2017 Dec 18;12(12):e0189951. doi: 10.1371/journal.pone.0189951 (PMC5734779; doi:10.1371/journal.pone.0189951)
Supplement: S5 Table — (XLSX) [file pone.0189951.s006.xlsx]

## Sheet: Sheet1
Table S5 Number of paired-reads and alignment rate of cv. Castlerock and LA1777 generated from WGRS analysis mapped onto the tomato reference genome SL3.0 version
Sample name	Number of obtained paired-reads	Number of high-quality paired-reads	Alignment rate
Castlerocka	176013628	174891930	0.9685
LA1777b	191059500	189859385	0.7071
a The susceptible cultivated tomato to late blight disease
b The resistant tomato wild species Solanum habrochaites to late blight
